# Supplementary material for: Targeting Redox Metabolism in Pancreatic Cancer
Source: MDPI journal article supplement (doi:10.3390/ijms22041534), 2021-02-03
Supplement: s1 [file s1]

**Table 1.** Anticancer treatments regulating ROS levels.

Abbreviations: CAT, catalase; ETC, electron transport chain; GPX, glutathione peroxidase; GSH, reduced glutathione; GSSG, glutathione disulfide; GCL, glutamate cysteine ligase; NSCLC, non-small-cell lung carcinoma; ROS, reactive oxygen species; SOD1, superoxide dismutase 1; TrxR, thioredoxin reductase.

| Drugs                                                                  | Mechanism of action                                                                                                        | Cancer types                                           | Context                                         | Median survival rate                                                                 | Ref(s)           |
|------------------------------------------------------------------------|----------------------------------------------------------------------------------------------------------------------------|--------------------------------------------------------|-------------------------------------------------|--------------------------------------------------------------------------------------|------------------|
| <b>Chemotherapeutic drugs targeting the redox metabolism in cancer</b> |                                                                                                                            |                                                        |                                                 |                                                                                      |                  |
| Gemcitabine                                                            | <b>DNA synthesis inhibition.</b><br>Induces the accumulation of ROS and increases the capacity of antioxidant programs     | Pancreatic cancer                                      | <i>In vitro</i> , and <i>in vivo</i>            |                                                                                      | [39]             |
| Taxanes (Paclitaxel and docetaxel)                                     | Promote mitochondrial cell death through the release of cytochrome c<br>Disrupt the mitochondrial electron transport chain | Different types of cancer                              | <i>In vitro</i> , and <i>in vivo</i>            |                                                                                      | [82, 83]         |
| Anthracyclines (Doxorubicin or epirubicin)                             | Insert into the DNA of replicating cells and inhibit topoisomerase II, which prevents DNA and RNA synthesis                | Different types of cancer                              | Clinical                                        | <b>Metastatic Breast Cancer: 7-8 months</b>                                          | [84, 85]         |
| Arsenic trioxide (As <sub>2</sub> O <sub>3</sub> )                     | Impairs the function of the mitochondrial electron transport chain<br>Inhibits GPx, TrxR and CAT                           | Acute promyelocytic leukemia and lung cancer           | <i>In vitro</i> , <i>in vivo</i> , and clinical | <b>Acute promyelocytic leukemia: complete remission</b>                              | [31, 32, 86, 87] |
| Methotrexate                                                           | Triggers ROS-associated cell apoptosis                                                                                     | Different types of cancer                              | <i>In vitro</i>                                 |                                                                                      | [88]             |
| Mitoxantrone                                                           | Triggers cell membrane scrambling                                                                                          | Different types of cancer                              | <i>In vitro</i>                                 |                                                                                      | [89]             |
| Tamoxifen                                                              | Promotes cancer cell senescence                                                                                            | Colon and breast cancer                                | <i>In vitro</i>                                 |                                                                                      | [90]             |
| Cisplatin                                                              | Generation of nuclear DNA adducts                                                                                          | Different types of cancer                              | <i>In vitro</i> , and clinical                  | <b>NSCLC: 9.1 months</b>                                                             | [91-93]          |
| ATN-224                                                                | Inhibits SOD1<br>Inhibits ETC complex IV                                                                                   | NSCLC and prostate cancer                              | <i>In vivo</i> , and clinical                   | <b>Prostate cancer: median progression-free survival 30 weeks</b>                    | [94, 95]         |
| <b>Compounds targeting the <i>de novo</i> GSH synthesis</b>            |                                                                                                                            |                                                        |                                                 |                                                                                      |                  |
| Buthionine sulfoximine (BSO)                                           | Inhibits GCL activity and <i>de novo</i> GSH synthesis<br>Enhances A <sub>2</sub> O <sub>3</sub> activity                  | Ovarian, breast and <b>pancreatic</b> cancer, melanoma | <i>In vitro</i> , and <i>in vivo</i>            |                                                                                      | [57, 96, 97]     |
| NOV-002                                                                | Glutathione disulfide mimetic that alters the intracellular GSH/GSSG ratio                                                 | Lung, breast and ovarian cancer                        | Clinical                                        | <b>Advanced NSCLC ~ 8.5 months</b>                                                   | [98, 99]         |
| Sulphasalazine                                                         | Inhibitor of cysteine/glutamate antiporter xCT; reduces intracellular transport of cysteine required for GSH synthesis     | Pancreatic and lung cancer                             | <i>In vitro</i> , and <i>in vivo</i>            |                                                                                      | [100, 101]       |
| L-asparaginase                                                         | Depletes glutamine, reduces GSH                                                                                            | Leukemia and pancreatic cancer                         | <i>In vitro</i> , <i>in vivo</i> , and clinical | <b>PDAC: overall survival 6.0 months (combo with chemotherapy) versus 4.4 months</b> | [102-104]        |

|                      |                                                                  |                              |                 |                      |            |
|----------------------|------------------------------------------------------------------|------------------------------|-----------------|----------------------|------------|
|                      |                                                                  |                              |                 | (chemotherapy alone) |            |
| Erastin              | Downregulates cysteine redox shuttle and blocks GSH regeneration | Different types of cancer    | <i>In vitro</i> |                      | [105, 106] |
| (1S, 3R)-RSL3 (RSL3) | Induce ferroptosis without depleting the GSH pool                | Lymphoma and renal carcinoma | <i>In vivo</i>  |                      | [107]      |
